# Supplementary material for: Antidiabetic Medications and Mortality Risk in Individuals With Pancreatic Cancer–Related Diabetes and Postpancreatitis Diabetes: A Nationwide Cohort Study
Source: Oxford University Press journal article supplement (doi:10.2337/dc19-0145), 2019-06-21
Supplement: dc190145supplementarydata.pdf [file dc190145supplementarydata.pdf]

## SUPPLEMENTARY DATA

### Supplementary Figure S1. Selection process of the study individuals

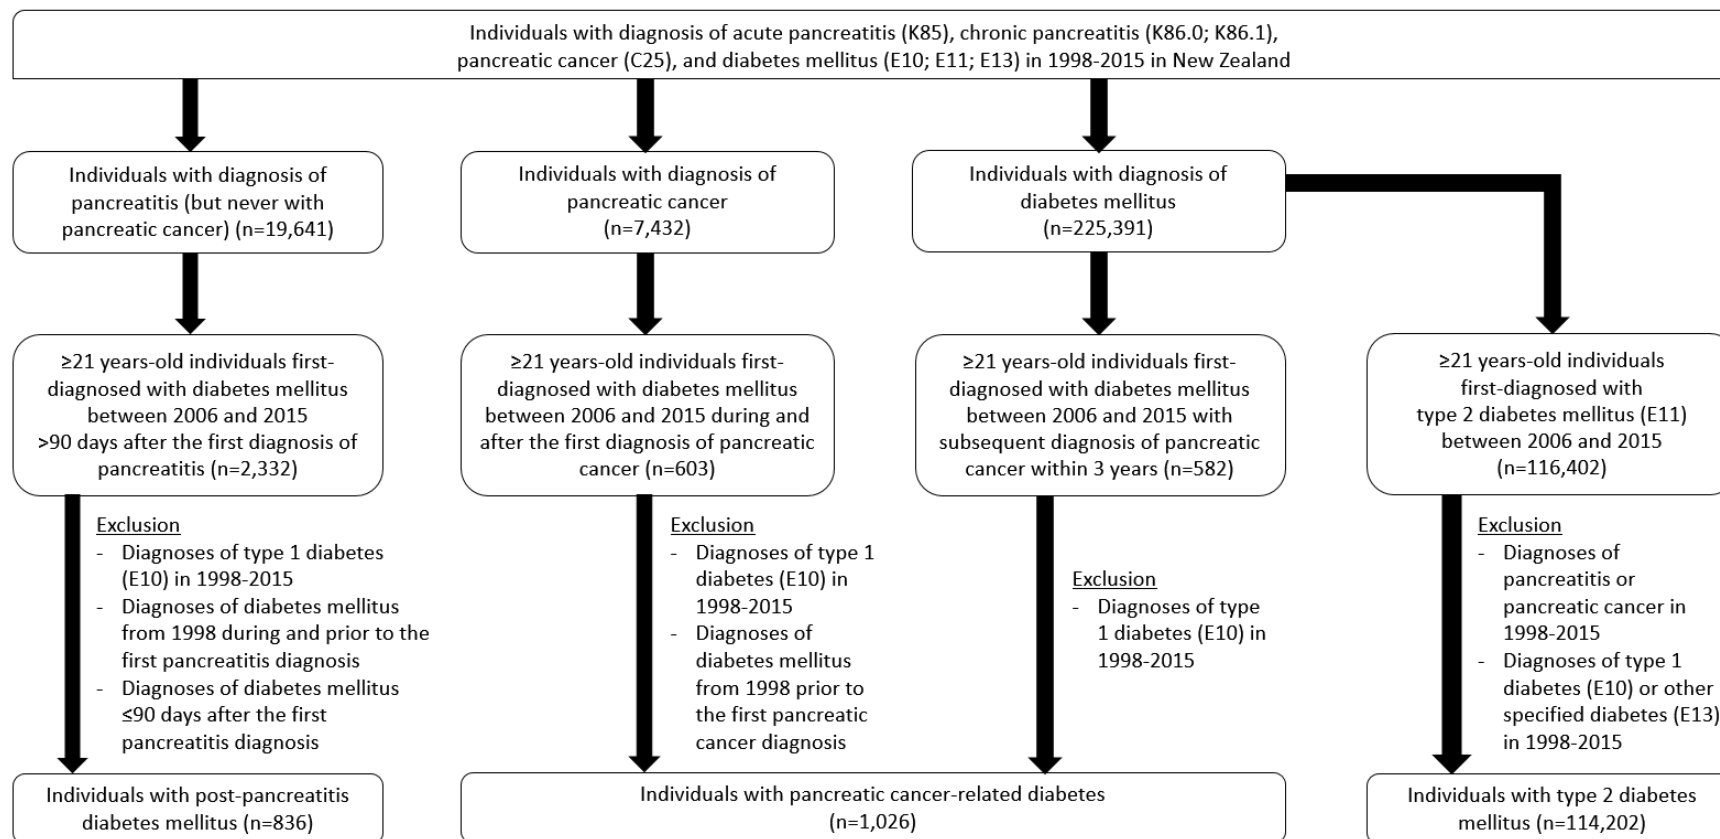

SUPPLEMENTARY DATA

**Supplementary Figure S2. Hazard ratio (solid line) and 95% confidence interval (dashed lines) of mortality associated with first metformin daily dose in individuals with post-pancreatitis diabetes mellitus**

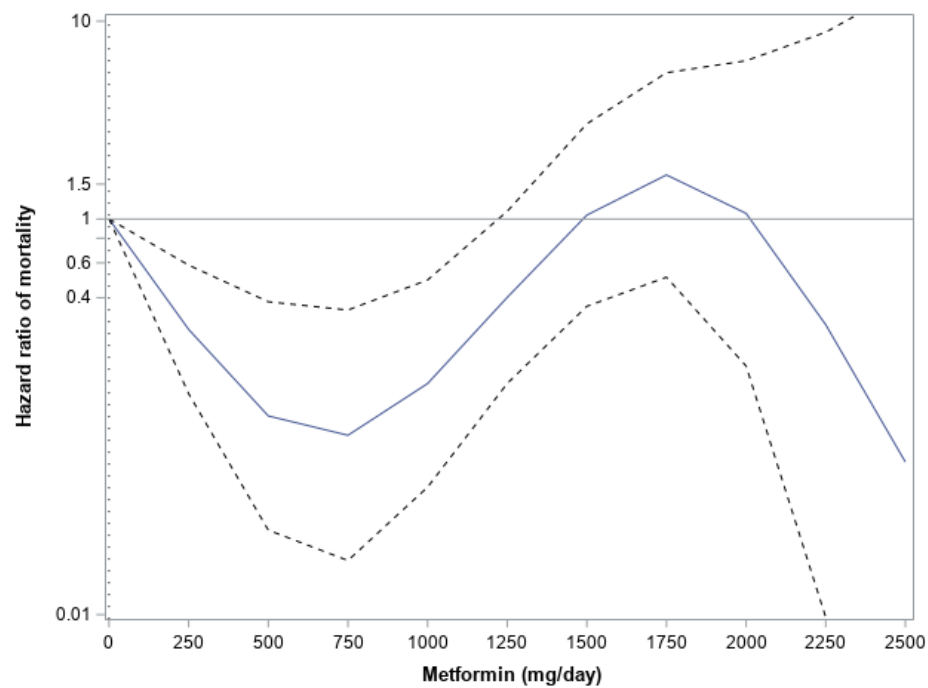

SUPPLEMENTARY DATA

**Supplementary Table S1. Associations between the use of antidiabetic medications and cause-specific mortality in individuals with diabetes of the exocrine pancreas**

|                                            | Cardiovascular mortality |                   |                      | Cancer mortality  |                   |                      | Other             |                   |                      |
|--------------------------------------------|--------------------------|-------------------|----------------------|-------------------|-------------------|----------------------|-------------------|-------------------|----------------------|
|                                            | No. of deaths (%)        | Crude HR (95% CI) | Adjusted HR (95% CI) | No. of deaths (%) | Crude HR (95% CI) | Adjusted HR (95% CI) | No. of deaths (%) | Crude HR (95% CI) | Adjusted HR (95% CI) |
| <b>Insulin use</b>                         |                          |                   |                      |                   |                   |                      |                   |                   |                      |
| <b>Post-pancreatitis diabetes mellitus</b> |                          |                   |                      |                   |                   |                      |                   |                   |                      |
| No antidiabetic medications                | 27 (10.5)                | 1.00              | 1.00                 | 23 (8.9)          | 1.00              | 1.00                 | 208 (80.6)        | 1.00              | 1.00                 |
| Never insulin                              | 22 (5.8)                 | 0.40 (0.23–0.71)  | 0.64 (0.35–1.16)     | 23 (6.1)          | 0.54 (0.30–0.96)  | 0.72 (0.39–1.33)     | 332 (88.1)        | 0.75 (0.63–0.89)  | 0.72 (0.60–0.86)     |
| Ever insulin                               | 10 (5.0)                 | 0.28 (0.14–0.59)  | 0.82 (0.37–1.83)     | 17 (8.5)          | 0.67 (0.36–1.27)  | 1.52 (0.74–3.10)     | 174 (86.6)        | 0.58 (0.47–0.71)  | 0.53 (0.42–0.66)     |
| <b>Pancreatic cancer-related diabetes</b>  |                          |                   |                      |                   |                   |                      |                   |                   |                      |
| No antidiabetic medications                | 7 (2.4)                  | 1.00              | 1.00                 | 241 (81.7)        | 1.00              | 1.00                 | 47 (15.9)         | 1.00              | 1.00                 |
| Never insulin                              | 3 (1.0)                  | 0.21 (0.05–0.81)  | 0.25 (0.06–1.01)     | 246 (84.5)        | 0.52 (0.44–0.62)  | 0.59 (0.49–0.71)     | 42 (14.4)         | 0.46 (0.30–0.70)  | 0.44 (0.28–0.68)     |
| Ever insulin                               | 7 (1.6)                  | 0.26 (0.09–0.74)  | 0.31 (0.10–0.93)     | 335 (76.1)        | 0.41 (0.35–0.49)  | 0.46 (0.39–0.55)     | 98 (22.3)         | 0.54 (0.38–0.77)  | 0.51 (0.35–0.74)     |
| <b>Metformin use</b>                       |                          |                   |                      |                   |                   |                      |                   |                   |                      |
| <b>Post-pancreatitis diabetes mellitus</b> |                          |                   |                      |                   |                   |                      |                   |                   |                      |
| No antidiabetic medications                | 27 (10.5)                | 1.00              | 1.00                 | 23 (8.9)          | 1.00              | 1.00                 | 208 (80.6)        | 1.00              | 1.00                 |
| Never metformin                            | 8 (10.0)                 | 0.65 (0.29–1.43)  | 0.97 (0.42–2.21)     | 6 (7.5)           | 0.67 (0.27–1.64)  | 0.91 (0.35–2.36)     | 66 (82.5)         | 0.63 (0.47–0.83)  | 0.61 (0.46–0.81)     |
| Ever metformin                             | 24 (4.8)                 | 0.31 (0.18–0.54)  | 0.61 (0.34–1.11)     | 34 (6.8)          | 0.58 (0.34–0.98)  | 0.90 (0.50–1.60)     | 440 (88.4)        | 0.69 (0.58–0.81)  | 0.67 (0.56–0.79)     |
| <b>Pancreatic cancer-related diabetes</b>  |                          |                   |                      |                   |                   |                      |                   |                   |                      |
| No antidiabetic medications                | 7 (2.4)                  | 1.00              | 1.00                 | 241 (81.7)        | 1.00              | 1.00                 | 47 (15.9)         | 1.00              | 1.00                 |
| Never metformin                            | 3 (1.8)                  | 0.29 (0.07–1.15)  | 0.28 (0.07–1.16)     | 131 (77.1)        | 0.44 (0.35–0.54)  | 0.44 (0.35–0.55)     | 36 (21.2)         | 0.43 (0.27–0.67)  | 0.41 (0.26–0.64)     |
| Ever metformin                             | 7 (1.3)                  | 0.22 (0.08–0.64)  | 0.29 (0.09–0.86)     | 450 (80.2)        | 0.46 (0.39–0.54)  | 0.54 (0.46–0.63)     | 104 (18.5)        | 0.55 (0.39–0.78)  | 0.53 (0.37–0.78)     |

Abbreviations: HR: hazard ratio, CI: confidence interval

Footnotes: Adjusted hazard ratios were from multivariable Cox regression models including age, sex, ethnicity, alcohol consumption, tobacco smoking, social deprivation index, and the Charlson comorbidity index. The 'ever insulin' subgroup included individuals who were prescribed insulin alone or in combination with other antidiabetic medications.
